# Supplementary material
Source: ML conference proceedings conference paper supplement (https://proceedings.neurips.cc/paper_files/paper/2023/hash/a0673542a242759ea637972f053b2e0b-Abstract.html)
Supplement: Supplementary file 1 [file a0673542a242759ea637972f053b2e0b-Supplemental-Conference.pdf]

## A Additional experiment

### A.1 More detailed accuracy and speed data for GD-YOLO

In this section, we report the test performance of our GD-YOLO with or without LAF module and pre-training. FPS and latency are measured in FP16-precision on a Tesla T4 in the same environment with TensorRT 7. Both the accuracy and the speed performance of our models are evaluated with the input resolution of 640x640. The result shown in Table 1 .

Table 1: Test results of GD-YOLO series model on COCO 2017 val. ‘†’ represents that the self-distillation method is utilized, ‘◇’ represents that the model don’t have LAF module, and ‘★’ represents that the MIM pre-training method is utilized.

| Method                 | AP <sup>val</sup>            | AP <sub>50</sub> <sup>val</sup> | AP <sub>small</sub> <sup>val</sup> | AP <sub>medium</sub> <sup>val</sup> | AP <sub>large</sub> <sup>val</sup> | FPS<br>(bs=32) | Params | FLOPs   |
|------------------------|------------------------------|---------------------------------|------------------------------------|-------------------------------------|------------------------------------|----------------|--------|---------|
| GD-YOLO-N <sup>◇</sup> | 38.37% / 38.82% <sup>†</sup> | 54.43% / 54.96% <sup>†</sup>    | 18.37% / 18.40% <sup>†</sup>       | 42.62% / 43.45% <sup>†</sup>        | 55.13% / 56.00% <sup>†</sup>       | 1087           | 5.6 M  | 12.0 G  |
| GD-YOLO-S <sup>◇</sup> | 44.47% / 45.57% <sup>†</sup> | 61.55% / 62.92% <sup>†</sup>    | 24.04% / 24.90% <sup>†</sup>       | 49.34% / 50.38% <sup>†</sup>        | 61.95% / 63.50% <sup>†</sup>       | 462            | 21.5 M | 45.8 G  |
| GD-YOLO-M <sup>◇</sup> | 49.41% / 50.26% <sup>†</sup> | 66.64% / 67.58% <sup>†</sup>    | 31.19% / 31.59% <sup>†</sup>       | 54.30% / 55.26% <sup>†</sup>        | 65.91% / 67.62% <sup>†</sup>       | 229            | 41.3 M | 86.8 G  |
| GD-YOLO-L <sup>◇</sup> | 51.68% / 52.65% <sup>†</sup> | 69.07% / 70.25% <sup>†</sup>    | 34.86% / 34.20% <sup>†</sup>       | 56.92% / 57.70% <sup>†</sup>        | 69.00% / 69.71% <sup>†</sup>       | 119            | 75.0 M | 150.6 G |
| GD-YOLO-N              | 39.57% / 39.92% <sup>†</sup> | 55.70% / 55.94% <sup>†</sup>    | 19.67% / 19.15% <sup>†</sup>       | 44.08% / 44.32% <sup>†</sup>        | 56.98% / 57.75% <sup>†</sup>       | 1030           | 5.6 M  | 12.1 G  |
| GD-YOLO-S              | 45.36% / 46.11% <sup>†</sup> | 62.48% / 63.33% <sup>†</sup>    | 25.32% / 25.22% <sup>†</sup>       | 50.21% / 51.23% <sup>†</sup>        | 62.63% / 63.42% <sup>†</sup>       | 446            | 21.5 M | 46.0 G  |
| GD-YOLO-M              | 49.77% / 50.86% <sup>†</sup> | 67.01% / 68.23% <sup>†</sup>    | 32.32% / 31.01% <sup>†</sup>       | 55.29% / 56.24% <sup>†</sup>        | 66.27% / 67.83% <sup>†</sup>       | 220            | 41.3 M | 87.5 G  |
| GD-YOLO-L              | 51.84% / 53.16% <sup>†</sup> | 68.94% / 70.49% <sup>†</sup>    | 34.12% / 34.53% <sup>†</sup>       | 57.36% / 58.60% <sup>†</sup>        | 68.17% / 70.07% <sup>†</sup>       | 116            | 75.1 M | 151.7 G |
| GD-YOLO-S <sup>★</sup> | 45.52% / 46.36% <sup>†</sup> | 62.20% / 63.36% <sup>†</sup>    | 24.66% / 25.26% <sup>†</sup>       | 50.76% / 51.30% <sup>†</sup>        | 63.24% / 63.64% <sup>†</sup>       | 446            | 21.5 M | 46.0 G  |
| GD-YOLO-M <sup>★</sup> | 50.16% / 51.14% <sup>†</sup> | 67.52% / 68.53% <sup>†</sup>    | 30.52% / 32.33% <sup>†</sup>       | 55.54% / 56.10% <sup>†</sup>        | 67.64% / 68.55% <sup>†</sup>       | 220            | 41.3 M | 87.5 G  |
| GD-YOLO-L <sup>★</sup> | 52.25% / 53.28% <sup>†</sup> | 69.61% / 70.93% <sup>†</sup>    | 33.09% / 33.83% <sup>†</sup>       | 57.77% / 58.92% <sup>†</sup>        | 69.01% / 69.92% <sup>†</sup>       | 116            | 75.1 M | 151.7 G |

### A.2 MIM pre-training ablation experiment

We also compared the GD-YOLO-S on COCO 2017 validation results for different MIM pre-training epochs without self-distillation. The result shown in Table 2 .

Table 2: Test results on COCO 2017 val for different pre-training epoch setting.

| Epoch | AP <sup>val</sup> | AP <sub>50</sub> <sup>val</sup> | AP <sub>small</sub> <sup>val</sup> | AP <sub>medium</sub> <sup>val</sup> | AP <sub>large</sub> <sup>val</sup> |
|-------|-------------------|---------------------------------|------------------------------------|-------------------------------------|------------------------------------|
| 400   | 45.39%            | 62.17%                          | 25.01%                             | 50.28%                              | 62.74%                             |
| 600   | 45.48%            | 62.18%                          | 25.56%                             | 50.63%                              | 62.85%                             |
| 800   | 45.52%            | 62.20%                          | 24.66%                             | 50.76%                              | 63.24%                             |

## B Comprehensive Latency and Throughput Benchmark

### B.1 Model Latency and Throughput on T4 GPU with TensorRT 8

Comparisons with other YOLO-series detectors on COCO 2017 val. FPS and latency are measured in FP16-precision on Tesla T4 in the same environment with TensorRT 8.2. The result shown in Table 3.

Table 3: Comparison of Latency and Throughput in YOLO series model on a T4 GPU using TensorRT 8.2.

| Method       | Input Size | FPS<br>(bs=1) | FPS<br>(bs=32) | Latency<br>(bs=1) |
|--------------|------------|---------------|----------------|-------------------|
| YOLOv5-N     | 640        | 702           | 843            | 1.4 ms            |
| YOLOv5-S     | 640        | 433           | 515            | 2.3 ms            |
| YOLOv5-M     | 640        | 202           | 235            | 4.9 ms            |
| YOLOv5-L     | 640        | 126           | 137            | 7.9 ms            |
| YOLOX-Tiny   | 416        | 766           | 1393           | 1.3 ms            |
| YOLOX-S      | 640        | 313           | 489            | 2.6 ms            |
| YOLOX-M      | 640        | 159           | 204            | 5.3 ms            |
| YOLOX-L      | 640        | 104           | 117            | 9.0 ms            |
| PPYOLOE-S    | 640        | 357           | 493            | 2.8 ms            |
| PPYOLOE-M    | 640        | 163           | 210            | 6.1 ms            |
| PPYOLOE-L    | 640        | 110           | 145            | 9.1 ms            |
| YOLOv7-Tiny  | 640        | 464           | 568            | 2.1 ms            |
| YOLOv7       | 640        | 128           | 135            | 7.6 ms            |
| YOLOv6-3.0-N | 640        | 785           | 1215           | 1.3 m s           |
| YOLOv6-3.0-S | 640        | 345           | 498            | 2.9 ms            |
| YOLOv6-3.0-M | 640        | 178           | 238            | 5.6 ms            |
| YOLOv6-3.0-L | 640        | 105           | 125            | 9.5 ms            |
| GD-YOLO-N    | 640        | 657           | 1191           | 1.4 ms            |
| GD-YOLO-S    | 640        | 308           | 492            | 3.1 ms            |
| GD-YOLO-M    | 640        | 157           | 241            | 6.1 ms            |
| GD-YOLO-L    | 640        | 94            | 137            | 10.3 ms           |

## 14 B.2 Model Latency and Throughput on V100 GPU with TensorRT 7

15 Comparisons with other YOLO-series detectors on COCO 2017 val. FPS and latency are measured  
16 in FP16-precision on Tesla V100 in the same environment with TensorRT 7.2. The result shown in  
17 Table 4 .

Table 4: Comparison of Latency and Throughput in YOLO series model on a V100 GPU using TensorRT 7.2.

| Method       | Input Size | FPS<br>(bs=1) | FPS<br>(bs=32) | Latency<br>(bs=1) |
|--------------|------------|---------------|----------------|-------------------|
| YOLOv5-N     | 640        | 577           | 1727           | 1.4 ms            |
| YOLOv5-S     | 640        | 449           | 1249           | 1.7 ms            |
| YOLOv5-M     | 640        | 271           | 698            | 3.0 ms            |
| YOLOv5-L     | 640        | 178           | 440            | 4.7 ms            |
| YOLOX-Tiny   | 416        | 569           | 2883           | 1.4 ms            |
| YOLOX-S      | 640        | 386           | 1206           | 2.0 ms            |
| YOLOX-M      | 640        | 245           | 600            | 3.4 ms            |
| YOLOX-L      | 640        | 149           | 361            | 5.6 ms            |
| PPYOLOE-S    | 640        | 322           | 1050           | 2.4 ms            |
| PPYOLOE-M    | 640        | 222           | 566            | 4.0 ms            |
| PPYOLOE-L    | 640        | 153           | 406            | 5.5 ms            |
| YOLOv7-Tiny  | 640        | 453           | 1565           | 1.7 ms            |
| YOLOv7       | 640        | 182           | 412            | 4.6 ms            |
| YOLOv6-3.0-N | 640        | 646           | 2660           | 1.2 m s           |
| YOLOv6-3.0-S | 640        | 399           | 1330           | 2.0 ms            |
| YOLOv6-3.0-M | 640        | 203           | 676            | 4.4 ms            |
| YOLOv6-3.0-L | 640        | 125           | 385            | 6.8 ms            |
| GD-YOLO-N    | 640        | 574           | 2457           | 1.7 ms            |
| GD-YOLO-S    | 640        | 391           | 1205           | 2.5 ms            |
| GD-YOLO-M    | 640        | 238           | 633            | 4.0 ms            |
| GD-YOLO-L    | 640        | 146           | 365            | 6.6 ms            |

## 18 C Broader impacts and limitations

19 **Broader impacts.** The YOLO model can be widely applied in fields such as healthcare and  
 20 intelligent transportation. In the healthcare domain, the YOLO series models can improve the early  
 21 diagnosis rates of certain diseases and reduce the cost of initial diagnosis, thereby saving more  
 22 lives. In the field of intelligent transportation, the YOLO model can assist in autonomous driving of  
 23 vehicles, enhancing traffic safety and efficiency. However, there are also risks associated with the  
 24 military application of the YOLO model, such as target recognition for drones and assisting military  
 25 reconnaissance. We will make every effort to prevent the use of our model for military purposes.

26 **Limitations.** Generally, making finer adjustments on the structure will help further improve the  
 27 model’s performance, but this requires a significant amount of computational resources. Additionally,  
 28 due to our algorithm’s heavy usage of attention operations, it may not be as friendly to some earlier  
 29 hardware support.

## 30 D CAM visualization

31 Below are the CAM visualization results of the neck for YOLOv5, YOLOv6, YOLOv7, YOLOv8,  
 32 and our GD-YOLO, shown in Fig. 1. It can be observed that our model assigns higher weights to the  
 33 detected regions of the targets.

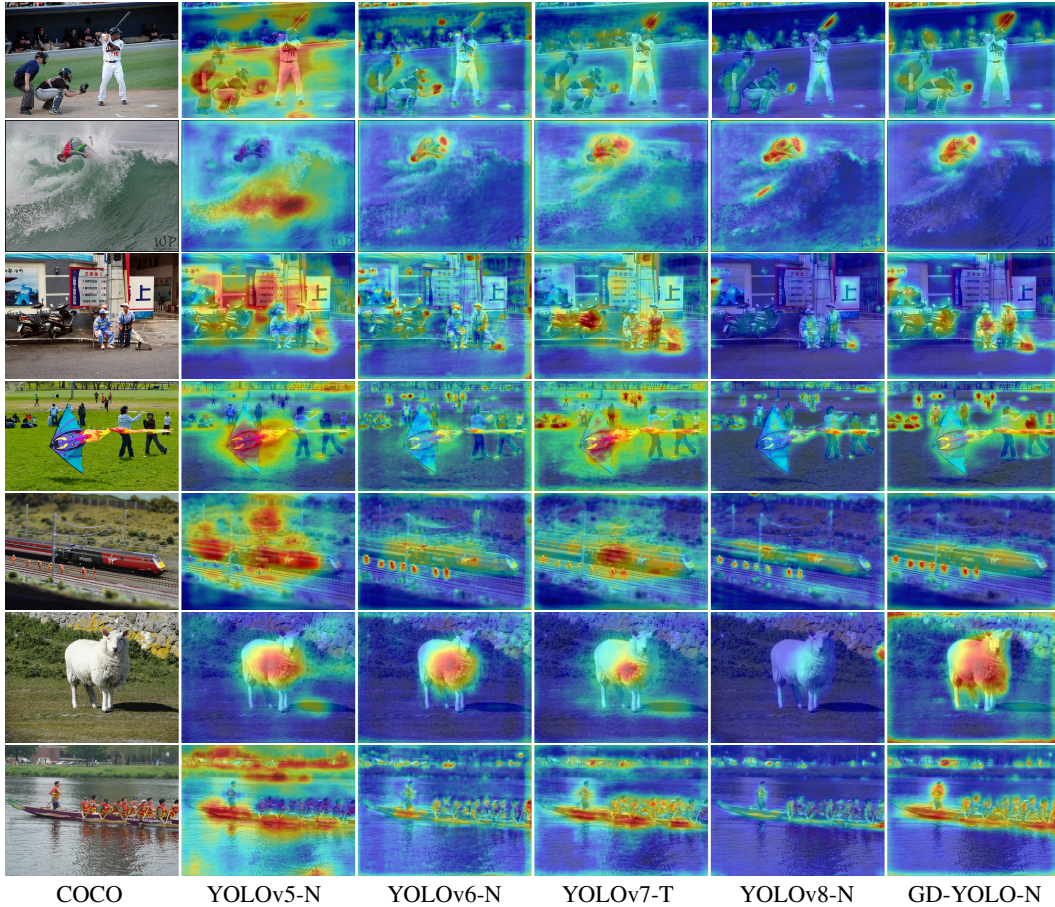

Figure 1: The CAM visualization results of the neck for YOLOv5, YOLOv6, YOLOv7, YOLOv8, and our GD-YOLO.
